1 **Diversity and biogeography of Woesearchaeota: A comprehensive**  
2 **analysis of multi-environment data**

3 Jing Xiao<sup>1, †</sup>, Yu Zhang<sup>2, †, \*</sup>, Wanning Chen<sup>1</sup>, Yanbing Xu<sup>1</sup>, Rui Zhao<sup>1</sup>, Liwen Tao<sup>1</sup>,  
4 Yuanqi Wu<sup>1</sup>, Yida Zhang<sup>3</sup>, Xiang Xiao<sup>4</sup>, Ruixin Zhu<sup>1, \*</sup>

5 <sup>1</sup>*Putuo People's Hospital, Department of Bioinformatics, Tongji University, Shanghai 200092, P.R.China*

6 <sup>2</sup>*School of Oceanography, State Key Laboratory of Ocean Engineering, Shanghai Jiao Tong University, Shanghai*  
7 *200240, P. R. China*

8 <sup>3</sup>*Department of Biomedical Informatics, Harvard Medical School, Boston, MA 02215, United States*

9 <sup>4</sup>*School of Life Science and Biotechnology, State Key Laboratory of Microbial Metabolism, Shanghai Jiao Tong*  
10 *University, Shanghai 200240, P. R. China*

11  
12 <sup>†</sup> Equal contribution

13

14 **Corresponding author:**

15 **Ruixin Zhu (rxzhu@tongji.edu.cn)**

16 Putuo people's Hospital, Department of Bioinformatics, Tongji University, 1239

17 Siping Road, Shanghai 200092, P.R. China.

18 Tel: 86-21-6598-1041

19

20 **Yu Zhang (zhang.yusjtu@sjtu.edu.cn)**

21 School of Oceanography, State Key Laboratory of Ocean Engineering, Shanghai Jiao

22 Tong University, Shanghai 200240, P. R. China.

23 Tel: 86-21-3420-7208

24

25 **Abstract**

26 Woesearchaeota is a newly proposed archaeal phylum frequently detected in various  
27 environments. Due to the limited systematical study, little is known about their  
28 distribution, taxonomy, and metabolism. Here, we conducted a comprehensive study  
29 for Woesearchaeota with 16S ribosomal RNA (rRNA) gene sequencing data of 27,709  
30 samples and metagenomic whole genome sequencing (WGS) data of 1,266 samples.  
31 We find that apart from free-living environments, Woesearchaeota also widely  
32 distribute in host-associated environments. And host-associated environmental  
33 parameters greatly affect their distribution. 81 Woesearchaeota genomes, including 33  
34 genomes firstly reconstructed in this project, were assigned to 59 Woesearchaeota  
35 species, suggesting their high taxonomic diversity. Comparative analysis indicated  
36 that Woesearchaeota have an open pan-genome with small core genome. Metabolic  
37 reconstruction showed that particular metabolic pathway absence in specific  
38 environments, demonstrated the metabolic diversity of Woesearchaeota varies in  
39 differences environments. These results have placed host-associated environments  
40 into the global biogeography of Woesearchaeota and have demonstrated their genomic  
41 diversity for future investigation of adaptive evolution.

42

43 **Key words:** Woesearchaeota, metagenomics, pan-genome, metabolism, distribution

44

45

## 46 **1. Introduction**

47 In the past few years, an increasing number of archaeal phyla have been proposed,  
48 which have greatly deepened our understanding for the ecological and evolutionary  
49 roles of Archaea domain<sup>1-5</sup>. Woesearchaeota is an archaeal phylum proposed by  
50 Castelle *et al.* based on metagenomic analysis<sup>6</sup>. With the limited genomic data  
51 extracted from environmental samples, Woesearchaeota is considered as one of the  
52 most widely distributed archaea in DPANN superphylum<sup>7,8</sup>. They have been detected  
53 in sediments, groundwater, soil, deep-sea hydrothermal vents, hypersaline lakes,  
54 wetland, permafrost, and human lung<sup>6,9,10</sup>. However, how the geochemical settings  
55 define the distribution pattern of Woesearchaeota and their ecological function,  
56 especially on a global scale, remain unclear.

57 Moreover, members within Woesearchaeota phylum appear to have highly  
58 divergent, sometimes deficient, metabolic potentials, and this further hinders the  
59 identification and isolation of Woesearchaeota. For example, based on 16S rRNA  
60 gene sequences, 26 potential subgroups were detected, although the taxonomic  
61 documentation was ambiguous<sup>9</sup>. Reconstruction of metabolic pathways from  
62 metagenome-assembled genomes (MAGs) of Woesearchaeota showed the absence of  
63 certain core biosynthesis, suggesting a symbiotic or parasitic lifestyle<sup>6,7,9</sup>. If this  
64 deficiency of independent living is a common phenomenon in the entire phylum, it  
65 would be particularly intriguing in the evolutionary point of view. Considering the  
66 lack of Woesearchaeota isolate, comparative genomics study based on large datasets of  
67 WGS should be a promising approach to access the genomic and metabolic feature of  
68 Woesearchaeota.

69 To date, with the accomplishment of several world-class microbiome projects, such  
70 as Earth Microbiome Project (EMP) and *Tara* Oceans Project<sup>11-14</sup>, more data from  
71 various environments are available for a systematically investigation. To expand  
72 knowledge for distribution, taxonomy, and metabolism of Woesearchaeota, we  
73 conducted a comprehensive study with combination of two types of data. 16S rRNA

74 gene sequencing data were used to explore their distribution characteristic, meanwhile,  
75 metagenomic data were collected to investigate taxonomic and metabolic diversity of  
76 Woesearchaeota. This endeavor allowed us to construct a framework for distribution,  
77 taxonomy, and metabolism of Woesearchaeota, contributing to guidance to efficient  
78 cultivation and profound investigation.

79

## 80 **2. Results**

### 81 **2.1 Biogeography of Woesearchaeota**

#### 82 **Widely distribution of Woesearchaeota.**

83 16S rRNA gene sequences from EMP were collected to explore the distribution  
84 characteristics of Woesearchaeota. A total of 27,709 samples were carefully analyzed  
85 in this study, and we got 23,428 qualified samples, among which 6,788 samples were  
86 identified as containing Woesearchaeota. These Woesearchaeota are widely  
87 distributed around the world, in both marine and inland environments (Fig. 1A).  
88 Further analysis revealed that Woesearchaeota not only present in free-living  
89 environments such as water, soil, and sediments, but also live in host-associated  
90 environments such as plant rhizosphere, biofilm, animal surface, and animal secretion  
91 (Fig. 1B). Apparently, Woesearchaeota are more often to be discovered in free-living  
92 environments rather than in host-associated environments. In free-living environments,  
93 Woesearchaeota are most widely distributed in the sediment, while in host-associated  
94 environment, Woesearchaeota are most extensively distributed in rhizosphere.

95

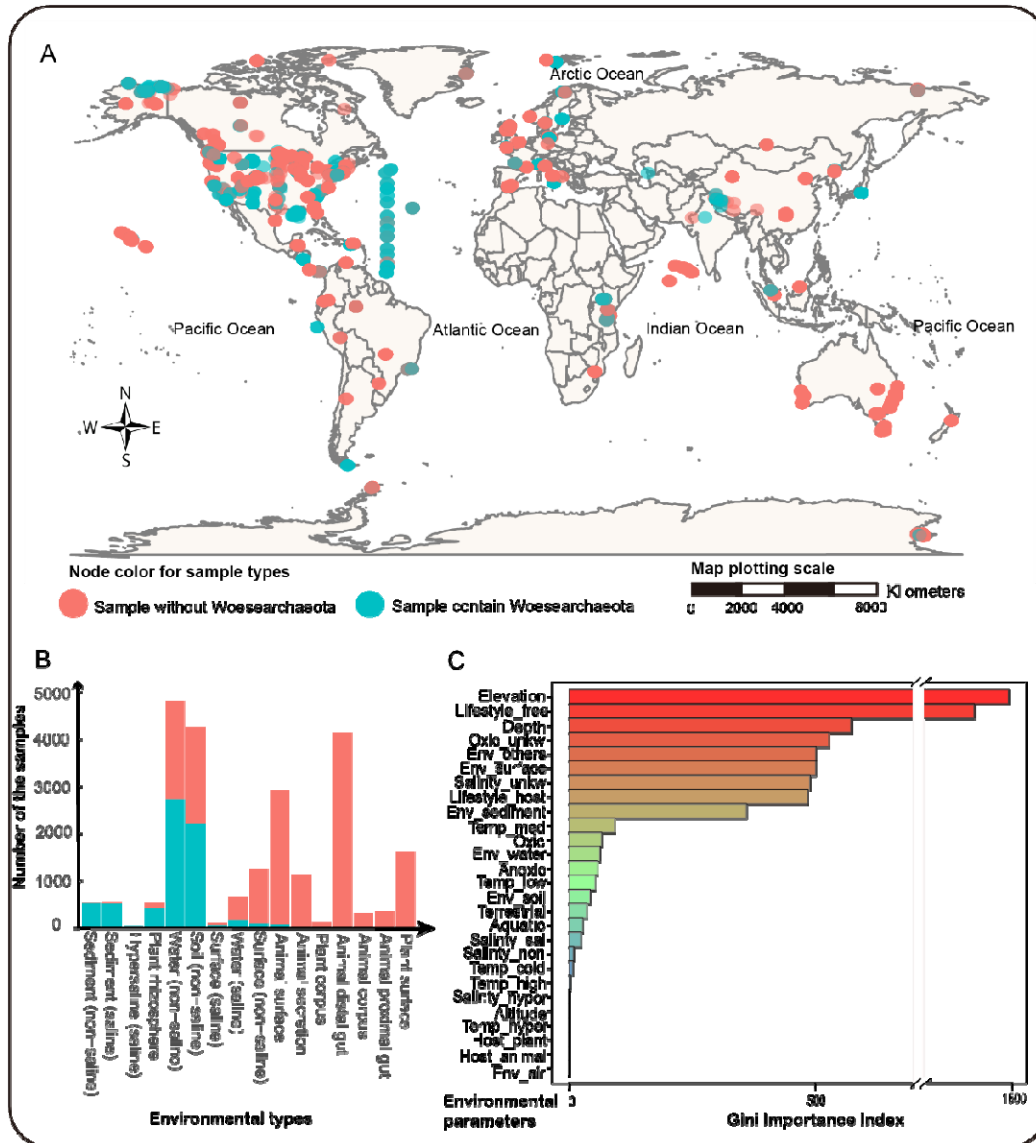

96

97

98 **Fig. 1** Distribution characteristics of Woesearchaeota. **A.** Global distribution of EMP samples

99 showed the present/absence of Woesearchaeota. **B.** Distribution of Woesearchaeota in different

100 types of environment (\*Number of samples from hypersaline environment is relatively small

101 compared to other environments, for all 13 samples, 10 of them contain Woesearchaeota). **C.**

102 Importance of different environmental factors affecting the distribution for Woesearchaeota.

102

### 103 **Impact of environmental parameters.**

104 To assess how environmental parameters effect the distribution of Woesearchaeota,

105 Random Forest classifier model<sup>15</sup> was constructed, and 27 environmental parameters

106 were taken as input feature vectors. The mean area under the curve (AUC) values of

107 the model is 0.9467(10-fold cross validation). Feature importance is evaluated by Gini

108 index (Fig. 1C). Among all the environmental factors, elevation and depth of the

109 samples are of great importance, affecting the distribution of Woesearchaeota. Besides,  
110 6 features (Lifestyle\_free, Oxic\_unkw, Env\_others, Salinity\_unkw, Lifestyle\_host,  
111 Temp-med) related to free-living/host-associated lifestyle also matters, which  
112 consistent with the finding that Woesearchaeota are mainly distributed in free-living  
113 environments. For the remaining environment factors, oxygen conditions, temperature,  
114 terrestrial/aquatic, and salinity show a decreasing importance, but they also affect the  
115 distribution of Woesearchaeota. While altitude, host type (plant/animal) almost have  
116 no effect on their distribution.

117

## 118 **2.2 Taxonomy of Woesearchaeota**

### 119 **Genome collection of Woesearchaeota.**

120 To explore the taxonomic characteristics of Woesearchaeota, genomes of  
121 Woesearchaeota in public database were also collected. We got 48 high-quality  
122 Woesearchaeota genomes (Supplementary Fig.1) after de-duplication and quality  
123 control for all 105 candidate genomes of Woesearchaeota. Among all high-quality  
124 genomes, nearly 90% of the genomes were from water sample including groundwater,  
125 marine water, and hot spring water, while only 4 genomes from sediments and 1  
126 genome from soil.

127

### 128 **Genome reconstruction and phylogeny of Woesearchaeota.**

129 We collected over ~35 terabyte metagenomic WGS data from dominant habitats of  
130 Woesearchaeota, including samples from sea water, rhizosphere and sediment. After  
131 trimmed all these data, de novo assembly and binning were then conducted, resulted  
132 in the reconstruction of 74 high quality (>70% completeness and <5% contamination)  
133 target archaeal genome bins. Phylogeny based on 16 concatenated ribosomal proteins  
134 reveals that these archaeal bins belong to different archaeal clades (Fig. 2). And 33  
135 genome bins belong to Woesearchaeota, among which 5 from sediments, 23 from sea  
136 water, and 5 from host-associated environment rhizosphere (Supplementary Table 1).

137

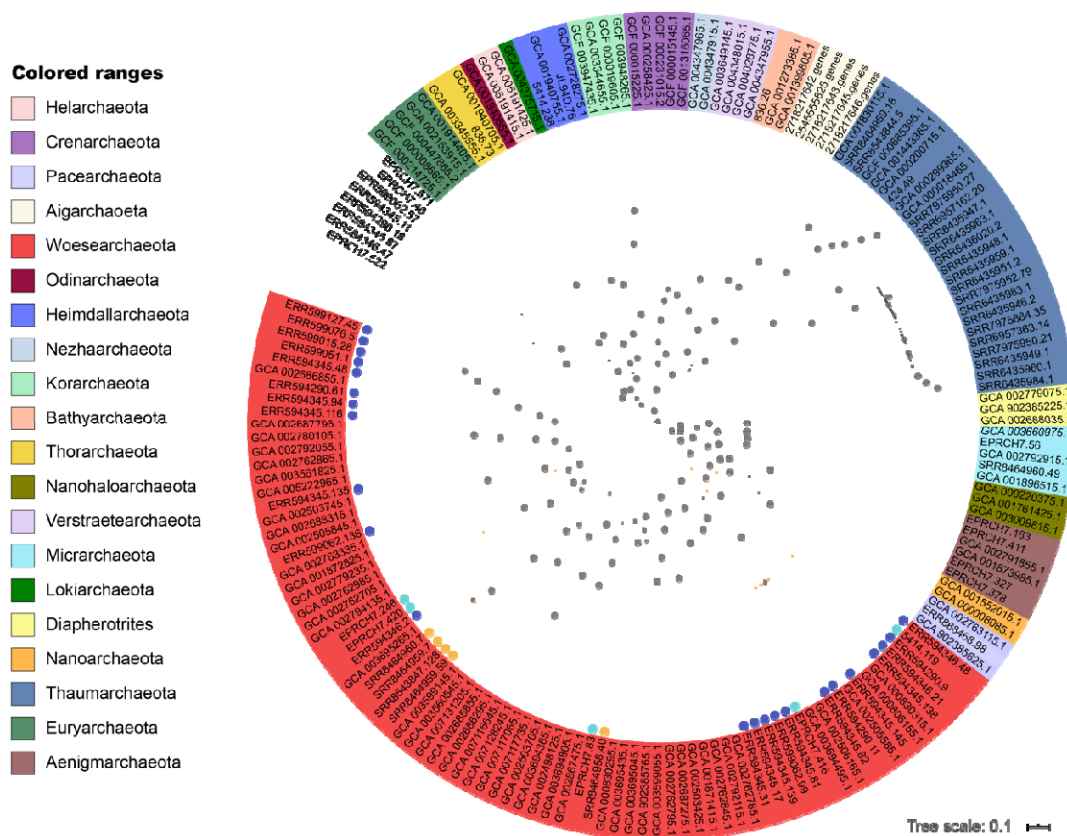

138

139 **Fig. 2** Phylogeny of archaeal phyla. Each leaf represents an archaeal genome, grey dot on each  
 140 branch represents bootstrap value, ranging from 0.6 to 1. and red range represent Woearchaeota,  
 141 leaves with colored dot mean the Woearchaeotal genomes reconstructed in this study, different  
 142 color represents different sample source. (dark blue dot: *Tara* Oceans Project; light blue dot:  
 143 in-house data; orange dot: NCBI-SRA).

144

### 145 **Taxonomic groups of Woearchaeota.**

146 For further investigation of Woearchaeotal taxonomic characteristics, 48  
 147 high-quality genomes of Woearchaeota from public database were also used.  
 148 Adding up 33 high-quality Woearchaeota genome bins reconstructed in this study,  
 149 we finally gathered 81 high-quality Woearchaeota genomes for further  
 150 study(Supplementary Fig.1). CheckM tool was used to evaluate genome quality, and  
 151 among all these high-quality genomes bins, more than half of the genome bins have  
 152 completeness higher than 90%. Moreover, all these Woearchaeota genome bins are  
 153 of small size (averagely 1.04 Mb), encoding 1,174 genes on average.

154 To accurately identify the taxonomic groups of Woesearchaeota genomes, we used  
155 whole genome sequences. Pairwise orthoANI (ANI, Average nucleotide identity)<sup>16, 17</sup>  
156 calculation among all 81 genomes were conducted. Based on previous studies,  
157 orthoANI value takes a similar range of cut cut-off as ANI for species demarcation,  
158 which is approximately 95–96%<sup>18</sup>. The taxonomic identification results showed that  
159 all 81 genomes belong to 59 Woesearchaeal species (Fig. 3), and orthoANI values  
160 among most genome bins are ~63%, showing that the Woesearchaeota are of high  
161 taxonomic diversity at the species level. Meanwhile, 19 new species of  
162 Woesearchaeota have been discovered in our study, including 2 species first  
163 discovered from host-associated environments.



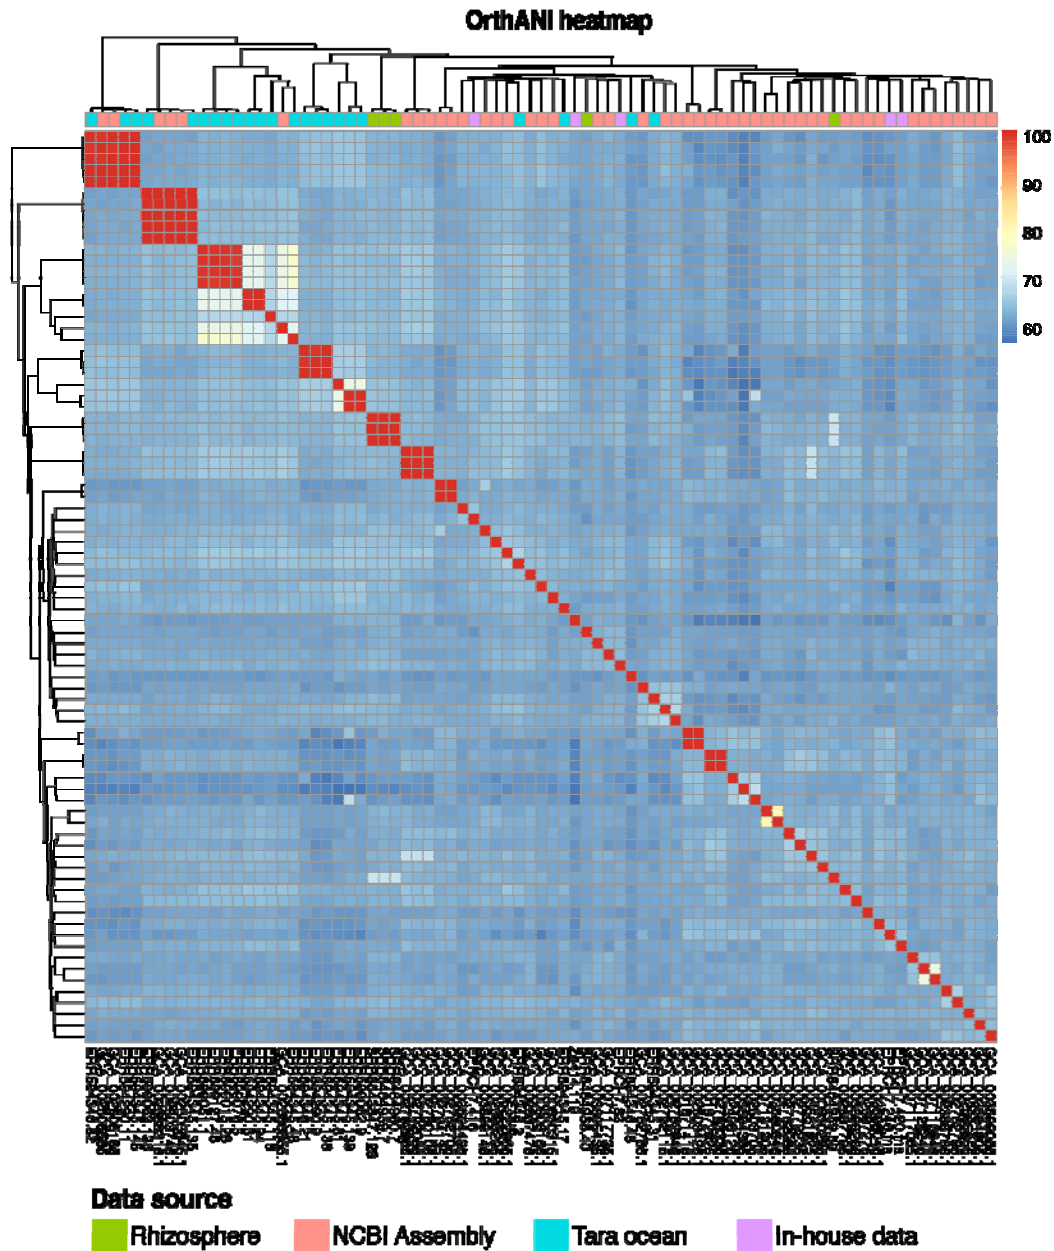

164

165 **Fig. 3** Taxonomic diversity of Woesearchaeota. Each grid represents the OrthoANI value between  
166 two corresponding genomes.

167

### 168 **2.3 Open pan-genome with limited core genome genes**

169 Among all 81 high-quality Woesearchaeota genomes, 17 genome bins (Table 1;  
170 Supplementary Fig.1) are nearly-complete (completeness > 95%) with relatively low  
171 contamination (contamination < 2.2%). Thus, a comparative genomics analysis for  
172 Woesearchaeota was conducted by using these genomes. A total of 20,731 predicted  
173 protein-coding-genes were obtained, which were clustered into 15,109 orthologous

174 clusters. The power-law regression analyses indicated an open pan-genome for  
 175 Woesearchaeota (Supplementary Fig.2). Besides, the contributions of core, accessory,  
 176 and unique genes in Woesearchaeal pan-genome (Fig. 4 A) showed that they only  
 177 contain a small core genome. On average, only 3.2% of genes in each Woesearchaeal  
 178 genome are core genes, and the rest are accessory genes and unique genes, accounting  
 179 for 47.3% and 49.5% genes in each genome, respectively. Moreover, proportion of  
 180 accessory genes and unique genes varies in different Woesearchaeal genome, and the  
 181 percentage of unique genes is higher than accessory genes in most genomes.

182

183 **Table 1. Genomic information of 17 nearly-complete Woesearchaeotal genomes**

| No | Genome Id       | Data Source | Completeness | Contamination | Biosample    | Metagenome_source                |
|----|-----------------|-------------|--------------|---------------|--------------|----------------------------------|
| 01 | GCA_005222965.1 | NCBI        | 99.18        | 1.65          | SAMN07236660 | marine sediment                  |
| 02 | GCA_002867475.1 | NCBI        | 98.9         | 2.2           | SAMN07982670 | enrichment from estuary sediment |
| 03 | GCA_000830295.1 | NCBI        | 98.9         | 1.1           | SAMN03202995 | Rifle groundwater                |
| 04 | GCA_002688315.1 | NCBI        | 98.63        | 0             | SAMN07982670 | enrichment from estuary sediment |
| 05 | GCA_002762785.1 | NCBI        | 97.8         | 0             | SAMN06659469 | Groundwater ( 2m )               |
| 06 | ERR594345.116   | In house    | 97.53        | 0             | SAMEA2619974 | sea water                        |
| 07 | ERR599062.136   | In house    | 97.53        | 1.1           | SAMEA2619970 | sea water                        |
| 08 | ERR594345.48    | In house    | 96.98        | 2.2           | SAMEA2619974 | sea water                        |
| 09 | SRR8464959.7    | In house    | 96.89        | 0             | SAMN10350739 | Carex aquatilis--Peat Soil       |
| 10 | GCA_002762985.1 | NCBI        | 96.7         | 1.1           | SAMN06659468 | Groundwater ( 2m )               |
| 11 | EPRCH7.83       | In house    | 96.7         | 1.1           | OEX003658    | Black smokers                    |
| 12 | ERR594345.135   | In house    | 96.43        | 1.1           | SAMEA2619974 | sea water                        |
| 13 | GCA_003695265.1 | NCBI        | 96.15        | 1.1           | SAMN10119972 | hot springs metagenome           |
| 14 | ERR594345.31    | In house    | 96.15        | 2.2           | SAMEA2619974 | sea water                        |
| 15 | SRR8464960.7    | In house    | 95.97        | 0             | SAMN10350571 | Carex aquatilis--Peat Soil       |
| 16 | GCA_002498125.1 | NCBI        | 95.6         | 1.1           | SAMN06027228 | soil metagenome                  |
| 17 | EPRCH7.420      | In house    | 95.6         | 1.1           | OEX003658    | Black smokers                    |

184

185 Further investigation revealed function profiles of Woesearchaeal pan-genome (Fig.  
 186 4 B). For core genes, most are assigned to “information storage and processing”,  
 187 followed by “cellular processes and signaling”, which only make up a much smaller  
 188 proportion. Compared to core genes, differences of function profiles are relatively  
 189 small in accessory genes and unique genes. And the majority of accessory genes and

190 unique genes are assigned to “information storage and processing” and “metabolism”,  
191 respectively. Meanwhile, poorly characterized genes presented in all three groups, and  
192 functions of these genes are still not clear, over 25% of the unique genes are so-called  
193 “poorly characterized” genes.  
194

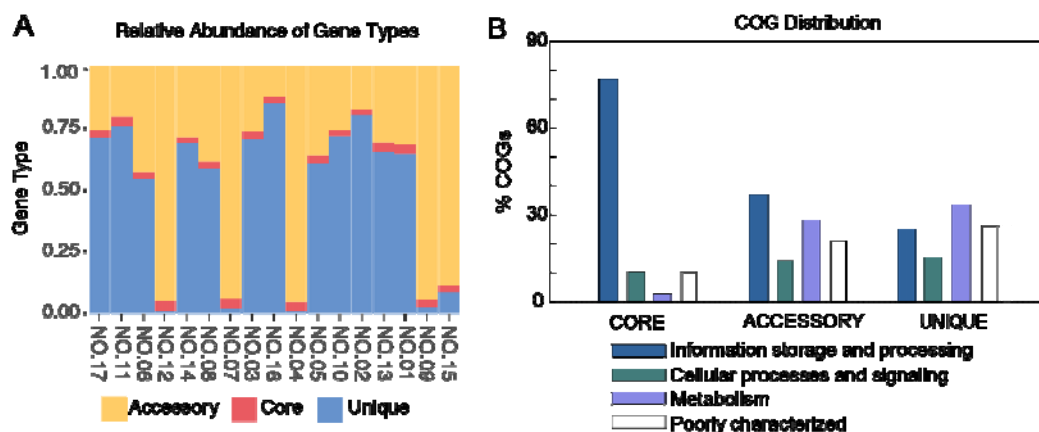

195  
196 **Fig. 4** Constituent and function of Woesearchaeotal Pan-genome. **A.** Relative abundance of  
197 core/accessory/unique genes in Woesearchaeotal genomes. **B.** Distribution of genes function.  
198

## 199 2.4 Metabolic capabilities of Woesearchaeota

200 To explore their metabolic capability, we used 17 nearly-complete genomes (Table 1)  
201 for further analysis. Metabolic reconstruction showed that most of the core  
202 biosynthetic pathways are incomplete in Woesearchaeota. For example, none of the  
203 Woesearchaeal genomes encodes the complete tricarboxylic acid cycle (TCA cycle).  
204 And most of the genes encoding respiratory-associated enzymes are absent in all these  
205 genomes. Besides, in a large proportion of these Woesearchaeal genomes, glycolytic  
206 pathway is incomplete because of the absence of few genes (Fig. 5).

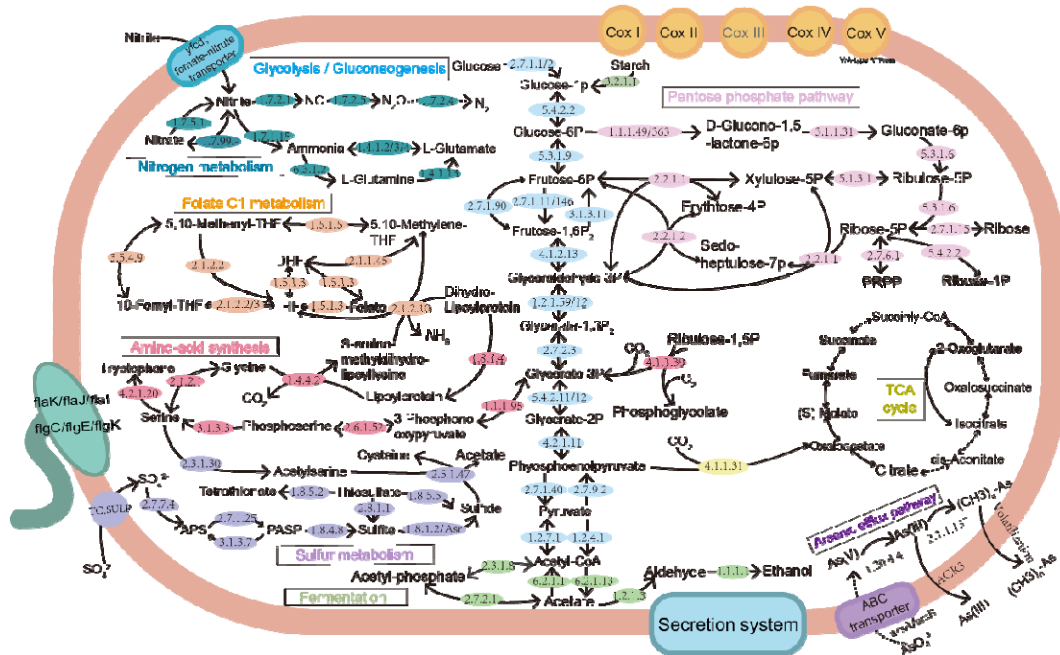

207

208 **Fig. 5** Metabolic pathways of Woesearchaeota. Pathways were constructed based on KEGG  
 209 database, the soiled arrows mean related genes were presented in some genomes while the dotted  
 210 arrows mean absence of corresponding genes in all genomes.

211

## 212 Carbon metabolism.

213 A complete glycolytic pathway in Woesearchaeota was first discovered in this study.

214 In previous studies, the gene *pfk* encoding phosphofructokinase was absent in all the

215 Woesearchaeotal genomes. However, this gene was found in several genomes with the

216 accumulation of nearly-complete Woesearchaeotal genomes. It can be inferred that

217 most Woesearchaeota can convert glucose. Notably, we discovered gene *porA/B* in

218 some Woesearchaeotal genomes, which has not been reported before. The *porA/B*

219 gene encodes enzyme converting pyruvate to acetyl-CoA, meanwhile, some other

220 Woesearchaeota accomplish the conversion by encoding pyruvate dehydrogenase.

221

## 222 Nitrogen metabolism.

223 Dissimilatory nitrate reduction pathway was first found in Woesearchaeota. And *narG*

224 and *nirD* genes are discovered in Woesearchaeotal genome, encoding nitrate reductase

225 and nitrite reductase respectively. These enzymes enable the transformation of Nitrite

226 to Ammonia. Moreover, genes encoding enzymes catalyzing denitrification were also  
227 detected, including *narG*, *nirK*, and *norC* genes, while *nosZ* gene was not discovered  
228 in our study.

229

### 230 **Sulfur metabolism.**

231 Only Assimilatory sulfate reduction pathways presented in Woesearchaeotal genomes.  
232 In these genomes, sulfate is reduced to APS (Adenylyl sulfate) firstly, then reduced to  
233 PAPS (3'-Phosphoadenylyl sulfate). Afterwards, *cysH* gene encodes the enzyme  
234 catalyzing PAPS to sulfite. Finally, either gene (*ars/cysJ* gene) encode enzyme to  
235 reduce sulfite to sulfide. *Ars* and *cysJ* genes present in different Woesearchaeotal  
236 genomes, encoding anaerobic sulfite reductase and sulfite reductase respectively.  
237 Additionally, we also found other sulfur metabolism related genes, including *doxD*,  
238 *TST*, *phsA*, *cysK*, and *cysE*.

239

### 240 **Arsenic metabolism.**

241 Interestingly, several genes involved in arsenic metabolism were discovered in some  
242 Woesearchaeotal genomes for the first time, such as *arsC2* and *ACR3* genes. In these  
243 genome, *arsC2* gene encodes arsenate reductase, which reduces arsenate to arsenite,  
244 and then arsenite is pumped out of the cells by using the transporter encoded by *ACR3*.  
245 Moreover, *AS3MT* and *arsC* genes also presented in some Woesearchaeotal genomes,  
246 indicating arsenic metabolism capability.

247

## 248 **2.5 Metabolic capability of Woesearchaeota varies in differences environments**

249 Metabolic reconstruction for Woesearchaeota from different environments shows that  
250 metabolic capability of Woesearchaeota differs in various environments (Fig. 6). As  
251 for nitrogen metabolism, most Woesearchaeotal genomes contain predicted genes for  
252 dissimilatory nitrate reduction and denitrification, however, no genes related to  
253 nitrogen metabolism presents in the genomes of Woesearchaeota from soil.

254 Meanwhile, metabolic reconstruction shows all Woesearchaeota genomes contain  
 255 sulfur metabolism related pathways, comparative analysis for their metabolic  
 256 capability reveals that none of Woesearchaeota from black smokers have genes  
 257 encoding enzymes that catalyze assimilatory sulfate reduction.  
 258

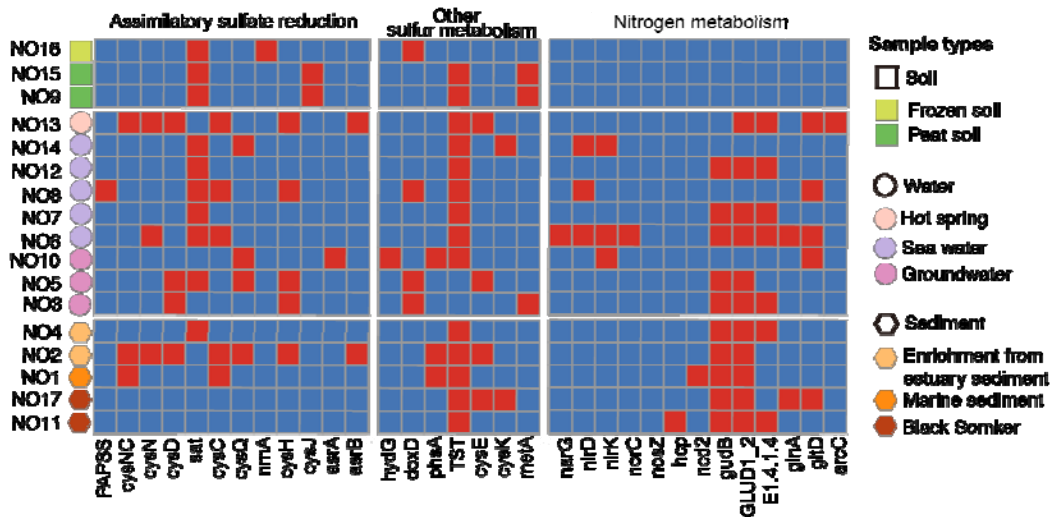

259  
 260 **Fig. 6** Metabolic capabilities of Woesearchaeota from different environments. Red grid means the  
 261 gene was detected in corresponding genome, while blue grid indicates the absence of the gene.  
 262 Numbers on the left represent genome ID in Table 1.

263  
 264 **3. Discussion**

265 In this study, a comprehensive analysis greatly expanded the knowledge of  
 266 Woesearchaeotal diversity in aspects of their distribution, taxonomy and metabolism.  
 267 Distribution analysis based on 16S rRNA gene sequencing data suggested that  
 268 Woesearchaeota also have a wide distribution in host-associated environments,  
 269 especially in plant rhizosphere, which greatly expanded our understanding for  
 270 distribution diversity of Woesearchaeota. The investigation of environmental  
 271 parameters revealed that apart from elevation and depth of these samples,  
 272 host-associated environmental parameters also play an important part in the  
 273 distribution of Woesearchaeota. Besides, oxygen condition is of greatest importance  
 274 among the remaining environmental parameters, which is consistent with previous  
 275 analysis<sup>9</sup>. The results suggest that the location rather than the geochemical conditions

276 plays a major role on driving the distribution pattern of Woesearchaeota. Meanwhile,  
277 it is important to note that only elevation and depth are consecutive data, while most  
278 parameters are discrete data due to the limitation of current data. With accumulation  
279 of more environmental parameters, future work may develop a full picture of the  
280 distribution characteristic of Woesearchaeota.

281 Besides, exploration of the taxonomic characteristic revealed that Woesearchaeota  
282 are of high taxonomic diversity, with 81 genomes assigned to 59 species. Taxonomic  
283 study for Woesearchaeota expanded the phylogenetic diversity of Woesearchaeota by  
284 adding up 19 new species of Woesearchaeota, which account for 32% of all  
285 Woesearchaeotal species, indicating analyses for metagenomic data from various  
286 environments can greatly deepen our understanding for Woesearchaeota, and the  
287 discovery of new Woesearchaeotal species will promote further taxonomic study.  
288 Moreover, pan-genome studies for Woesearchaeota show that the core genome of  
289 Woesearchaeota is small. Considering comparative analysis was on the phylum level,  
290 the great distance among all genomes may account for the relatively small core  
291 genome. Highly diversity and small core genome of Woesearchaeotal implies that  
292 Woesearchaeota have strong ability in speciation, further research focusing on this  
293 ability may reveal evolution mechanism of Woesearchaeota, which is also known as  
294 fast-evolving archaeal taxa.

295 Meanwhile, with the extended dataset, Woesearchaeota is confirmed as with small  
296 genome sizes with limited metabolic capabilities, suggesting a host-dependent  
297 lifestyle. Metabolic reconstruction combined with pan-genome analyses provided a  
298 framework to explore the metabolic diversity of Woesearchaeota. Woesearchaeota  
299 have a large open pan-genome, of which accessory genes and unique genes make up a  
300 large proportion. And over 30% of these genes are assigned to “Metabolism”,  
301 suggesting unique metabolic way in different Woesearchaeotal genomes. These genes  
302 play an important role in the diversity and adaptability of Woesearchaeota. Further  
303 investigation for Woesearchaeota from various environments shows that Metabolic

304 capability of Woesearchaeota differs in different environments. Although some  
305 archaea were reported to have a significant impact on nitrogen cycles in soils<sup>19</sup>, the  
306 only environment where Woesearchaeota have deficiency in nitrogen metabolism was  
307 soil. Meanwhile, Woesearchaeota from black smokers are unable to conduct  
308 assimilatory sulfate reduction. It is known that black smokers are rich in  
309 sulfur-bearing minerals, they emit particles such as H<sub>2</sub>S and FeS, which provide  
310 microorganism with energy by oxidation<sup>20</sup>. Since sulfur plays an important role in this  
311 environment, it is vital to investigate whether the lack of specific genes is influenced  
312 by the environment. Lateral gene transfer (LGT) is an important driving force in the  
313 evolution of microorganisms<sup>21-24</sup>, thus, it could conceivably be hypothesized that  
314 Woesearchaeota gained these genes by LGT from the environments to help them  
315 adapt to the environments. And future researches should be undertaken for hypothesis  
316 testing.

317

#### 318 **4. Conclusions**

319 In summary, we performed a comprehensive study to investigate the distribution,  
320 taxonomy, and metabolism of Woesearchaeota. The distribution pattern suggested that  
321 Woesearchaeota are widely distributed in various biotopes, including host-associated  
322 environments. Then, 33 high-quality Woesearchaeotal genomes were reconstructed  
323 from metagenomic data, greatly expanded taxonomic group of Woesearchaeota. And  
324 these genomes are collected for further taxonomic study and revealed that  
325 Woesearchaeota are of high taxonomic diversity. Meanwhile, Comparative genomic  
326 analysis showed that Woesearchaeota have a large open pan-genome with small core  
327 genome. Metabolic reconstruction for Woesearchaeota implied their metabolic  
328 potential for Nitrogen, Sulfur, and Arsenic. Moreover, metabolic capacity of  
329 Woesearchaeota varies in different environments, suggested that they are of high  
330 metabolic diversity. This study greatly expanded our knowledge for distribution,  
331 taxonomy, and metabolism of Woesearchaeota. And it demonstrated great diversity of  
332 this archaeal phylum in different aspects. However, due to the limitation of current



333 data, our knowledge about the driving force of metabolic diversity in Woesearchaeota  
334 is limited. Thus, future researches are encouraged to explore this problem.

335

## 336 **5. Data and methods**

### 337 **5.1 Data collection**

#### 338 **16S rRNA gene sequencing data.**

339 8,023,841 represented Operational taxonomic unit (OTU) sequences from 27,709  
340 samples were collected from EMP<sup>11, 12</sup>. Meanwhile, OTU composition and  
341 environmental parameters for all samples were gathered.

342

#### 343 **Woesearchaeotal metagenome-assembled genomes.**

344 All metagenome-assembled genomes (MAGs) of Woesearchaeota from public  
345 database and previous studies were collected. These genomes were retrieved (by 8th  
346 October, 2019) from NCBI Assembly database  
347 (<https://www.ncbi.nlm.nih.gov/assembly>) matching the query string “(“Candidatus  
348 Woesearchaeota”[Organism] OR woesearchaeota[All Fields]) AND latest[filter]”.  
349 Furthermore, Woesearchaeotal genomes from prior studies were also gathered<sup>6, 9</sup>.  
350 Then a custom perl script was used for de-duplication, and CheckM (version 1.0.13)  
351 was used to estimate the quality of these genomes. Only high-quality  
352 (completeness>70% and contamination<5%) genomes were used for further  
353 investigation.

354

#### 355 **Metagenomic WGS data.**

356 A total of ~35 terabyte metagenomic data were collected for metagenomic study,  
357 including samples from rhizosphere, sediment, and water. Based on our distribution  
358 exploration, among all host-associated environments, Woesearchaeota are most  
359 widely distributed in rhizosphere. Thus, metadata for metagenomes of 102  
360 rhizosphere samples collected from NCBI-SRA  
361 (<https://trace.ncbi.nlm.nih.gov/Traces/sra/>). Meanwhile, only few genomes have been

362 reconstructed from sediment samples in public database, thus we used in-house  
363 marine sediments samples, including samples of black smoker and marine sediments  
364 (see **Data availability** for detail). Moreover, *Tara* Oceans Project provides a  
365 systematic sampling data for marine microbe<sup>13, 25</sup>, and 1,158 water samples were  
366 collected from this project.

367

## 368 **5.2 Distribution characteristic exploration**

369 Taxonomic classification was conducted using BLAST+, all OTU sequences were  
370 BLASTed against SILVA SSU128<sup>26, 27</sup>. For each OTU sequence, we filtered results  
371 with percent identity less than 0.80, and the OTU sequence will be annotated as  
372 Woesearchaeota while over 51% of the filtered results belonging to Woesearchaeota<sup>28</sup>.  
373 Quality control for all samples (kept samples marked as qc\_filtered == "TRUE" in  
374 EMP && counts>10,000 && no missing parameters) with OTU composition analysis  
375 identified samples containing Woesearchaeota (relative abundance of  
376 Woesearchaeotal OTU > 0.01%).

377

## 378 **Environmental parameter analysis.**

379 We used Random Forest<sup>15</sup> to investigate the impact of environmental parameters on  
380 the distribution of Woesearchaeota. First, a label is assigned to each sample based on  
381 existence/absence of Woesearchaeota. Second, by utilizing the sample environment  
382 factors, such as altitude, depth, oxic/anoxic, salinity, etc., a feature vector containing  
383 all environmental parameters is generated for each sample. Third, a Random forest  
384 classifier is trained and 10-fold cross validation was implied for evaluation (R  
385 package 'randomForest'). Last, Gini importance index are calculated to estimate  
386 feature importance<sup>29</sup>.

387

## 388 **5.3 Genome reconstruction from metagenomic data**

389 For all those metagenomic data, raw sequencing reads are trimmed by using

390 Trimmomatic (version 0.38; SLIDINGWINDOW:10:20 MINLEN:50)<sup>30</sup>. Then  
391 trimmed short reads were assembled to long contigs using MEGAHIT (version 1.1.3)  
392 with default parameters<sup>31</sup>. Qualified reads were then mapped to contigs using BamM  
393 (version 1.7.3; <http://ecogenomics.github.io/BamM/>) to calculate the coverage  
394 information. Afterwards, genome binning was performed on contigs by MetaBAT2  
395 (version 2.12.1) with default parameters<sup>32</sup>, and the minimum size of a contig for  
396 binning is 2,500. CheckM (version 1.0.13) was used to estimate the completeness and  
397 contamination of all bins<sup>33</sup>.

398

#### 399 **5.4 Taxonomy analysis**

400 For phylogenetic analysis, representative archaeal reference genomes were  
401 downloaded from NCBI Assembly database. Then, CheckM was used to estimate the  
402 quality of these genomes, and high-quality reference genomes were collected.  
403 Meanwhile, target high-quality genome bins (Marker lineage annotated as  
404 “k\_\_Archaea (UID2)” in CheckM) reconstructed from metagenomic data were also  
405 used for phylogenetic analysis. Gene prediction was performed using Prodigal  
406 (version 2.6.3) with “-p meta”<sup>34</sup>. HMM models were used to identify 16 ribosomal  
407 proteins (L2, L3, L4, L5, L6, L14, L15, L16, L18, L22, L24, S3, S8, S10, S17, S19)  
408 from all archaeal genomes using HMMER (version 3.1b2) with “hmmsearch -E  
409 1E-5”<sup>6, 35, 36</sup>. Genomes with less than 8 ribosomal proteins were not included in the  
410 analyses. Then, individual proteins were aligned with MUSCLE(version 3.8.3.1)<sup>37</sup>,  
411 trimmed using trimAL (version 2.0) with “-automated1”<sup>38</sup>. Maximum-Likelihood  
412 phylogeny of 16 concatenated proteins using both fasttree(version 2.1.0; -lg -gamma)  
413 and IQ-TREE (version 1.6.12; -st AA -m MFP -bb 1000 -nt 16)<sup>39, 40</sup>.

414 Woesearchaeotal genomes reconstructed from metagenomic data combined with  
415 reference genomes belong to Woesearchaeota were collected for taxonomic  
416 identification(Supplementary Fig.3). OrthoANI value were calculated pairwise by  
417 using OrthoANI tool (<https://www.ezbiocloud.net/tools/orthoani>)<sup>18</sup>.

418

### 419 **5.5 Pan-genome profiling**

420 Taken the reduced genomes of Woesearchaeota in consideration, quality estimation  
421 for all Woesearchaeotal genomes were conducted using CheckM with a refined  
422 marker set of Archaea. And those nearly complete genomes (completeness>95%,  
423 contamination <5%) were used for comparative genomics analysis. Protein sequences  
424 for each genome were predicted using Prodigal<sup>34</sup>. USEARCH was used for  
425 orthologous clustering with 50% sequence identity taken as cut-off value. And the  
426 power-law regression model and exponential curve fit model were used to calculated  
427 the pan-genome size and core genome size, respectively. Then, we analyzed the  
428 distribution of core gene, accessory gene and unique gene in each Woesearchaeotal  
429 genome. In addition, function annotation for each orthologous protein cluster is based  
430 on protein BLAST against reference COG (Clusters of Orthologous Groups of  
431 proteins) and KEGG databases<sup>41, 42</sup>. Protein clustering, pan-genome profile analysis,  
432 and function and pathway analysis are conducted using BPGA-pipeline<sup>43</sup>  
433 (<https://iicb.res.in/bpga/downloads.html>).

434

### 435 **5.6 Metabolic prediction**

436 Nearly complete genomes of Woesearchaeota were collected to perform metabolic  
437 reconstruction. Prodigal was used to predict open reading frames (ORFs) from these  
438 genome bins. The ORFs were annotated by using eggno-mapper(v2)<sup>44, 45</sup>, and  
439 resulting data contained Gene Ontology (GO) terms, KEGG Orthology (KO) and  
440 archaeal clusters of orthologous genes (arCOGs). KEGG metabolic pathways was  
441 reconstructed for each genome by using KO with KEGG mapper tool<sup>42</sup>. To infer  
442 metabolic capacities of Woesearchaeota from different environments, environmental  
443 factors are combined for a comparative analysis.

444

### 445 **Data availability**

446 Woese archaeotal high-quality genomes reconstructed in this study have been  
447 deposited at NODE (<https://www.biosino.org/node/>) under accessions OEP000995.  
448 Besides, other high-quality genomes reconstructed from *Tara* Oceans Project and  
449 rhizosphere samples have been deposited at NODE under accessions OEP000994 and  
450 accessions OEP000996, respectively.

451 Moreover, in-house metagenomic data used in this study have been deposited at  
452 NODE under the project ID OEP000957, and the experiment ID are  
453 OEX003653~OEX003658. These data are available under from the corresponding  
454 author on reasonable request.

455 Meanwhile, metagenomic data from *Tara* Oceans Project used in this study are  
456 under project ID PRJEB1787, PRJEB1788, PRJEB4352, PRJEB4419. Besides,  
457 accession numbers of rhizosphere metagenomic data are provided in Supplementary  
458 Table 2. And EMP data is available on <https://earthmicrobiome.org/>.

459

#### 460 **Acknowledgement**

461 This work was supported by National Natural Science Foundation of China  
462 (81774152 to RXZ; 41676177, 91951117 to YZ; 41776173 to XX), Natural Science  
463 Foundation, the Shanghai Committee of Science and Technology 16ZR1449800 (to  
464 RXZ). The funders had no role in study design, data collection and analysis, decision  
465 to publish, or preparation of the manuscript.

466

#### 467 **Competing interests**

468 The authors declare no competing interests.

469

#### 470 **Author contribution statement**

471 RXZ and YZ conceived and designed the project. Each author has contributed  
472 significantly to the submitted work. JX and YZ drafted the manuscript. WNC, YBX,  
473 RZ, LWT, YQW, YDZ, XX and RXZ revised the manuscript. All authors read and

474 approved the final manuscript.

475

## 476 **References**

- 477 1. Castelle, C.J. & Banfield, J.F. Major New Microbial Groups Expand Diversity  
478 and Alter our Understanding of the Tree of Life. *Cell* **172**, 1181-1197 (2018).
- 479 2. Spang, A., Caceres, E.F. & Ettema, T.J.G. Genomic exploration of the  
480 diversity, ecology, and evolution of the archaeal domain of life. *Science (New*  
481 *York, N.Y.)* **357** (2017).
- 482 3. Xiao, J. et al. Archaea, the tree of life, and cellular evolution in eukaryotes.  
483 *Science China Earth Sciences* **62**, 489-506 (2019).
- 484 4. Fan, L. et al. Phylogenetic analyses with systematic taxon sampling show that  
485 mitochondria branch within Alphaproteobacteria. *Nature ecology & evolution*  
486 (2020).
- 487 5. Baker, B.J. et al. Diversity, ecology and evolution of Archaea. *Nature*  
488 *microbiology* **5**, 887-900 (2020).
- 489 6. Castelle, C.J. et al. Genomic expansion of domain archaea highlights roles for  
490 organisms from new phyla in anaerobic carbon cycling. *Current biology* **25**,  
491 690-701 (2015).
- 492 7. Dombrowski, N., Lee, J.H., Williams, T.A., Offre, P. & Spang, A. Genomic  
493 diversity, lifestyles and evolutionary origins of DPANN archaea. *FEMS*  
494 *microbiology letters* **366** (2019).
- 495 8. Rinke, C. et al. Insights into the phylogeny and coding potential of microbial  
496 dark matter. *Nature* **499**, 431-437 (2013).
- 497 9. Liu, X. et al. Insights into the ecology, evolution, and metabolism of the  
498 widespread Woese archaeal lineages. *Microbiome* **6**, 102 (2018).
- 499 10. Koskinen, K. et al. First Insights into the Diverse Human Archaeome: Specific  
500 Detection of Archaea in the Gastrointestinal Tract, Lung, and Nose and on  
501 Skin. *mBio* **8**, e00824-00817 (2017).
- 502 11. Gilbert, J.A., Jansson, J.K. & Knight, R. The Earth Microbiome project:  
503 successes and aspirations. *BMC Biol* **12**, 69 (2014).
- 504 12. Thompson, L.R. et al. A communal catalogue reveals Earth's multiscale  
505 microbial diversity. *Nature* **551**, 457-463 (2017).
- 506 13. Zhang, H. & Ning, K. The Tara Oceans Project: New Opportunities and  
507 Greater Challenges Ahead. *Genomics, proteomics & bioinformatics* **13**,  
508 275-277 (2015).
- 509 14. Parks, D.H. et al. Recovery of nearly 8,000 metagenome-assembled genomes  
510 substantially expands the tree of life. *Nature microbiology* **2**, 1533-1542  
511 (2017).
- 512 15. Breiman, L. Random forests. *Machine learning* **45**, 5-32 (2001).
- 513 16. Goris, J. et al. DNA-DNA hybridization values and their relationship to  
514 whole-genome sequence similarities. *Int J Syst Evol Microbiol* **57**, 81-91

- 515 (2007).
- 516 17. Teske, A. & Sorensen, K.B. Uncultured archaea in deep marine subsurface  
517 sediments: have we caught them all? *The ISME journal* **2**, 3-18 (2008).
- 518 18. Lee, I., Ouk Kim, Y., Park, S.-C. & Chun, J. OrthoANI: An improved  
519 algorithm and software for calculating average nucleotide identity.  
520 *International Journal of Systematic and Evolutionary Microbiology* **66**,  
521 1100-1103 (2016).
- 522 19. Xie, W. et al. The response of archaeal species to seasonal variables in a  
523 subtropical aerated soil: insight into the low abundant methanogens. *Applied*  
524 *microbiology and biotechnology* **101**, 6505-6515 (2017).
- 525 20. Kato, S. et al. Metabolic Potential of As-yet-uncultured Archaeal Lineages of  
526 Candidatus Hydrothermarchaeota Thriving in Deep-sea Metal Sulfide  
527 Deposits. *Microbes Environ* **34**, 293-303 (2019).
- 528 21. Zhaxybayeva, O. & Doolittle, W.F. Lateral gene transfer. *Current Biology* **21**,  
529 R242-R246 (2011).
- 530 22. Popa, O. & Dagan, T. Trends and barriers to lateral gene transfer in  
531 prokaryotes. *Current opinion in microbiology* **14**, 615-623 (2011).
- 532 23. Jain, R., Rivera, M.C. & Lake, J.A. Horizontal gene transfer among genomes:  
533 the complexity hypothesis. *Proceedings of the National Academy of Sciences*  
534 *of the United States of America* **96**, 3801-3806 (1999).
- 535 24. Daubin, V. & Szollosi, G.J. Horizontal Gene Transfer and the History of Life.  
536 *Cold Spring Harb Perspect Biol* **8**, a018036 (2016).
- 537 25. Sunagawa, S. et al. Tara Oceans: towards global ocean ecosystems biology.  
538 *Nature reviews. Microbiology* (2020).
- 539 26. Altschul, S.F., Gish, W., Miller, W., Myers, E.W. & Lipman, D.J. Basic local  
540 alignment search tool. *Journal of molecular biology* **215**, 403-410 (1990).
- 541 27. Glockner, F.O. et al. 25 years of serving the community with ribosomal RNA  
542 gene reference databases and tools. *J Biotechnol* **261**, 169-176 (2017).
- 543 28. Bokulich, N.A. et al. Optimizing taxonomic classification of marker-gene  
544 amplicon sequences with QIIME 2 's q2-feature-classifier plugin. *Microbiome*  
545 **6**, 90 (2018).
- 546 29. Qi, Y. in Ensemble machine learning 307-323 (Springer, 2012).
- 547 30. Bolger, A.M., Lohse, M. & Usadel, B. Trimmomatic: a flexible trimmer for  
548 Illumina sequence data. *Bioinformatics* **30**, 2114-2120 (2014).
- 549 31. Li, D., Liu, C.M., Luo, R., Sadakane, K. & Lam, T.W. MEGAHIT: an  
550 ultra-fast single-node solution for large and complex metagenomics assembly  
551 via succinct de Bruijn graph. *Bioinformatics* **31**, 1674-1676 (2015).
- 552 32. Kang, D.D. et al. MetaBAT 2: an adaptive binning algorithm for robust and  
553 efficient genome reconstruction from metagenome assemblies. *PeerJ* **7**, e7359  
554 (2019).
- 555 33. Parks, D.H., Imelfort, M., Skennerton, C.T., Hugenholtz, P. & Tyson, G.W.  
556 CheckM: assessing the quality of microbial genomes recovered from isolates,

- 557 single cells, and metagenomes. *Genome research* **25**, 1043-1055 (2015).
- 558 34. Hyatt, D. et al. Prodigal: prokaryotic gene recognition and translation  
559 initiation site identification. *BMC bioinformatics* **11**, 119 (2010).
- 560 35. Johnson, L.S., Eddy, S.R. & Portugaly, E. Hidden Markov model speed  
561 heuristic and iterative HMM search procedure. *BMC bioinformatics* **11**, 431  
562 (2010).
- 563 36. Hug, L.A. et al. A new view of the tree of life. *Nature microbiology* **1**, 16048  
564 (2016).
- 565 37. Edgar, R.C. MUSCLE: multiple sequence alignment with high accuracy and  
566 high throughput. *Nucleic acids research* **32**, 1792-1797 (2004).
- 567 38. Capella-Gutiérrez, S., Silla-Martínez, J.M. & Gabaldón, T. trimAl: a tool for  
568 automated alignment trimming in large-scale phylogenetic analyses.  
569 *Bioinformatics* **25**, 1972-1973 (2009).
- 570 39. Price, M.N., Dehal, P.S. & Arkin, A.P. FastTree 2--approximately  
571 maximum-likelihood trees for large alignments. *PloS one* **5**, e9490 (2010).
- 572 40. Nguyen, L.-T., Schmidt, H.A., Von Haeseler, A. & Minh, B.Q. IQ-TREE: a  
573 fast and effective stochastic algorithm for estimating maximum-likelihood  
574 phylogenies. *Molecular biology and evolution* **32**, 268-274 (2015).
- 575 41. Tatusov, R.L., Galperin, M.Y., Natale, D.A. & Koonin, E.V. The COG  
576 database: a tool for genome-scale analysis of protein functions and evolution.  
577 *Nucleic Acids Res* **28**, 33-36 (2000).
- 578 42. Kanehisa, M. KEGG: Kyoto Encyclopedia of Genes and Genomes. *Nucleic  
579 Acids Research* **28**, 27-30 (2000).
- 580 43. Chaudhari, N.M., Gupta, V.K. & Dutta, C. BPGA- an ultra-fast pan-genome  
581 analysis pipeline. *Scientific reports* **6**, 24373 (2016).
- 582 44. Huerta-Cepas, J. et al. Fast Genome-Wide Functional Annotation through  
583 Orthology Assignment by eggNOG-Mapper. *Molecular biology and evolution*  
584 **34**, 2115-2122 (2017).
- 585 45. Huerta-Cepas, J. et al. eggNOG 5.0: a hierarchical, functionally and  
586 phylogenetically annotated orthology resource based on 5090 organisms and  
587 2502 viruses. *Nucleic Acids Res* **47**, D309-D314 (2019).
- 588
